# Supplementary material for: Rationalisation of weak ferromagnetism in manganese(iii) chains: the relation between structure and ordering phenomena
Source: Royal Society of Chemistry journal article supplement (doi:10.1039/b314355d), 2004-01-01
Supplement: b314355d.doc [file b314355d.doc]

**Supplementary material**

Figure S1

View along the crystallographic *b* axis showing the pattern of weak hydrogen bonds (thick broken line) connecting the manganese ions Mn and Mn*iii* where *iii* is the symmetry operation x+1/2, y+1/2, z of the space group P212121. Note that the hydrogen on N4*iii* already participates in a hydrogen bond (2.893(2) Å) to O13*iii* of the bridging sulphate (thin dotted line).

Figure S2

Zero-field cooled (open symbols) and field cooled (filled symbols) temperature-dependent magnetisation of a powdered sample of **1** measured at 50 Oe.

Figure S3

Magnetisation and hysteresis at 2 K of a powdered sample of **1** measured as a function of the applied field by scanning down in field. The intercept with the y axis (the remnant magnetisation) is 400 cm3 mol-1 Gauss and the numerical value of the intercept with the x axis (the coercive field) is 500 Oe.

**Details of the calculation of the dipolar interaction**

The spins in the chains are coupled by exchange interaction with the axis of anisotropy perpendicular to the plane of the nitrogen atoms coordinating the MnIII ions. Instead the spins of different chains interact through dipolar interaction. The introduction of dipolar interactions establishes a competition between the short-range antiferromagnetic order and the long-range dipolar interaction. For the calculation of the dipolar energy of these two systems we suppose the dipolar interactions are unable to change the orientations of the spins, whose direction is characterised by the angle  and  previously discussed. They are able only to change their relative directions, so we position the magnetic moments in the easy axis direction with the neighbouring spins in the same chain antiparallel to each other. Moreover we use the point dipolar approximation and we neglect the entropy term, thus performing a zero temperature evaluation of the energy. All the relative directions of spins in different chains are scanned, and the dipolar energies are calculated for these different alignments of spins. The Hamiltonian that describe these systems is:

(S1)

where and are, respectively, the distance between the i-th and j-th spin and the dipolar moment of the i-th spin, g is the Landè factor and μB is the Bohr magneton. We consider the convergence has been reached when an increase of 10% of the integration radius correspond to a variation of the energy less than 1%. The radius so obtained has been evaluated in 300 Å. Finally we have to consider the demagnetisation factor by integrating over a spherical volume. In ferromagnetic structures the minimum of energy is reached through the formation of elongated domains, which reduce to zero the destabilisation energy due to the demagnetisation factor ( J. M. Luttinger, L. Tisza, *Phys. Rev.* **1946**, *70*, 954. C. Kittel, *Phys. Rev*. **1951**, *82*, 965. R. B. Griffiths, *Phys. Rev*. **1968**, *176*, 655).

In our calculation, where we have assumed a spherical sample, this factor is therefore equal to (4/3)π and the correlated energy to subtract from the calculated energy is equal to:

, (S2)

where V and Mt are, the volume and the total magnetisation of the elementary cell, respectively. In this way we study the properties of the ground state of the model. The inter-chain dipolar energies have been calculated assuming both weak-ferromagnetic configuration A and B and three possible antiferromagnetic structures where the magnetic cell is doubled along *a*, along *c*, and simultaneously along *a* and *c*. The results are reported in Table S1 for both compounds.

**Table S1:** Inter-chain dipolar energy (mK) calculated for different spin configurations for **1** and **2**. The values are referred to one manganese spin. Configuration A and B correspond to parallel and antiparallel alignments, respectively, of the component along *b* of the magnetic moment of the manganese sites related by the symmetry operation *iii*: x+1/2, y+1/2, z for **1** and *iv*: x+1/2, y+1/2, z+1/2 for **2**. The energies of the most stable configurations are in bold.

|  | **1** | **2** |
| --- | --- | --- |
| WF A | 0.81 | **10** |
| WF B | 0.84 | 22 |
| AF (a) | 2.9 | 5.5 |
| AF (c) | 2.4 | 5.5 |
| AF (a+c) | **4.4** | 5.7 |
